# Supplementary material for: Plastome of the mycoheterotrophic eudicotExacum paucisquama(Gentianaceae) exhibits extensive gene loss and a highly expanded inverted repeat region
Source: PeerJ journal article supplement (doi:10.7717/peerj.9157), 2020-06-09

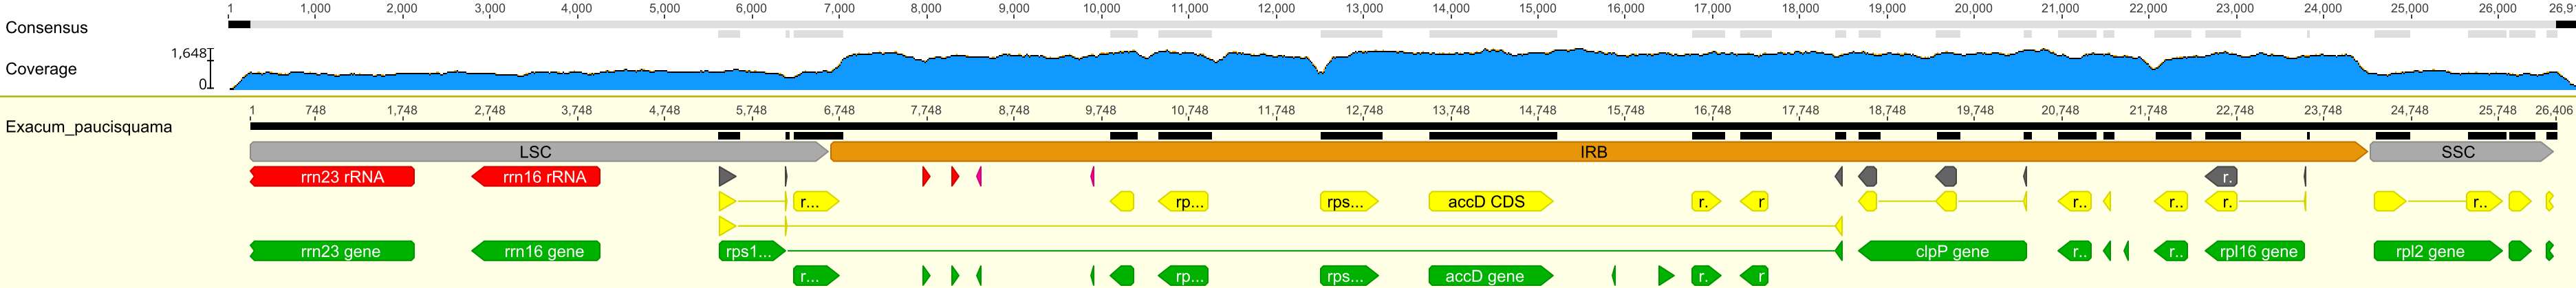

Supplement: Fig._S1.pdf [file Fig._S1.pdf]
