# Supplementary material for: Plastome of the mycoheterotrophic eudicot Exacum paucisquama (Gentianaceae) exhibits extensive gene loss and a highly expanded inverted repeat region
Source: PubMed Central journal article supplement (PMC7292021; doi:10.7717/peerj.9157), 2020-06-09

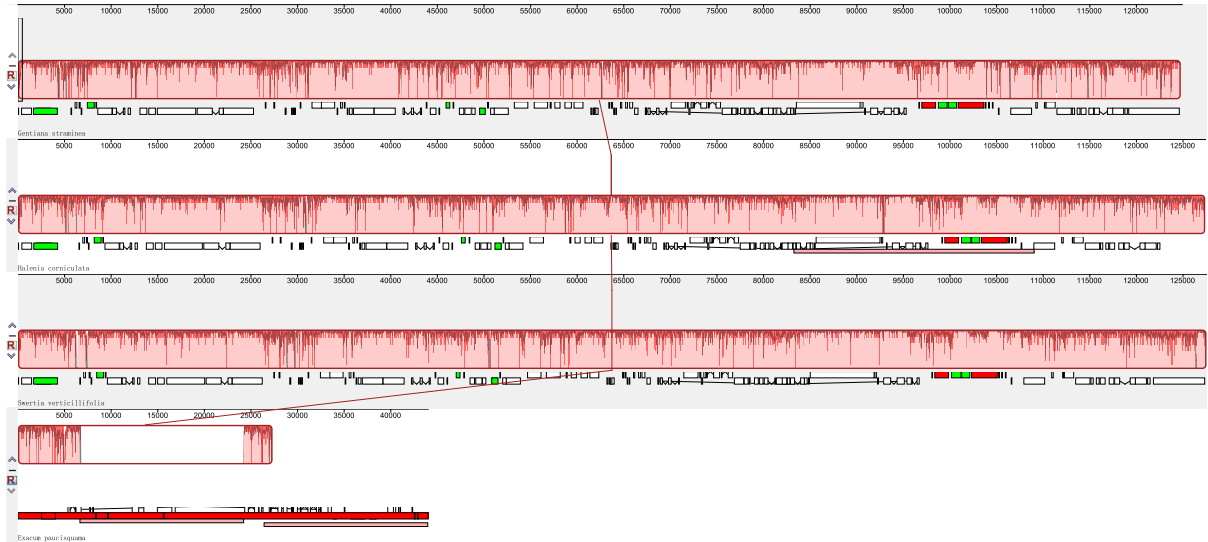

Supplement: peerj-08-9157-s002.pdf [file peerj-08-9157-s002.pdf]
