# Supplementary material for: Plastome of the mycoheterotrophic eudicot Exacum paucisquama (Gentianaceae) exhibits extensive gene loss and a highly expanded inverted repeat region
Source: PeerJ. 2020 Jun 9;8:e9157. doi: 10.7717/peerj.9157 (PMC7292021; doi:10.7717/peerj.9157)
Supplement: Supplemental Information 3 [file peerj-08-9157-s003.xlsx]

## Sheet: Sheet1
Table S1. Length and GC content of 18 plastomes analyzed in this study.
Family	Species	Length (in bp)					GC Content (in %)					NCBI accession
		Total	LSC	IR	SSC	One IR1	Total	LSC	IR	SSC	One IR1
Apodanthaceae	Pilostyles aethiopica	11348	-	-	-	11348	24.2	-	-	-	24.2	NC_029235
Aristolochiaceae	Hydnora visseri	27233	22751	1466	1550	25767	23.4	24	19	23	23.7	NC_029358
Balanophoraceae	Balanophora laxiflora	15505	-	-	-	15505	12.2	-	-	-	12.2	KX784265
Cynomoriaceae	Cynomorium coccineum	45519	4003	20163	1190	25356	31	22.2	32.4	13.2	29.9	KX270752
Cytinaceae	Cytinus hypocistis	19400	-	-	-	19400	29.9	-	-	-	29.9	NC_031150
Ericaceae	Allotropa virgata	35983	-	-	-	35983	33.1	-	-	-	33.1	NC_035580
	Hemitomes congestum	35569	-	-	-	35569	33.8	-	-	-	33.8	NC_035581
	Monotropa hypopitys	35336	-	-	-	35336	34.3	-	-	-	34.3	NC_029704
	Pityopus californicus	35926	-	-	-	35926	34.4	-	-	-	34.4	NC_035584
Gentianaceae	Exacum paucisquama	44028	6651	17622	2133	26406	36.2	42.9	34.9	36.6	37.1	MN067514
Orchidaceae	Epipogium aphyllum	30650	8030	11310	-	19340	32.8	20.1	37.3	-	30.2	NC_026449
	Epipogium roseum	19047	-	-	-	19047	30.6	-	-	-	30.6	NC_026448
	Gastrodia elata	35304	-	-	-	35304	26.8	-	-	-	26.8	NC_037409
	Rhizanthella gardneri	59190	26360	9898	13295	49553	34.2	29.3	38.6	37	33.3	NC_014874
Orobanchaceae	Conopholis americana	45673	-	-	-	45673	33.9	-	-	-	33.9	NC_023131
	Epifagus virginiana	70028	19799	22735	4759	47293	36	29.2	40.3	22.7	33.9	NC_001568
Thismiaceae	Thismia tentaculata	16031	7799	2948	2336	13083	27.2	29.1	30	13.7	26.5	KX171421
Triuridaceae	Sciaphila densiflora	21485	-	-	-	21485	39.9	-	-	-	39.9	NC_027659
1One IR: plastome excluding one IR.
